# Supplementary material for: Gemini surfactant-like peptide-based nanocages with β-sheet-enhanced stability and encapsulation efficiency of hydrophobic anticancer drugs
Source: Royal Society of Chemistry journal article supplement (doi:10.1039/d3ra01950k), 2023-01-01
Supplement: d3ra01950k1.pdf [file d3ra01950k1.pdf]

## Supplementary Materials

### Gemini Surfactant-like Peptide-based Nanocages with $\beta$ - sheet-Enhanced Stability and Encapsulation Efficiency of Hydrophobic Anticancer Drugs

*Feng Gao*<sup>a, #</sup>, *Xinmin Zhao*<sup>b, #</sup>, *Qiankang Si*<sup>b</sup>, *Xingkun Niu*<sup>b</sup>, *Shaojie Hou*<sup>c</sup>, *Shihao Liu*<sup>c</sup>, *Jun Guo*<sup>c, \*</sup>, *Liping Wang*<sup>c, \*</sup> and *Feng Zhang*<sup>a, b, c, \*</sup>

<sup>a</sup> School of Life Science, Inner Mongolia Agricultural University, Hohhot 010010, China.

<sup>b</sup> Quantum Biophotonic Lab, Key Laboratory of Optical Technology and Instrument for Medicine, Ministry of Education, School of Optical-Electrical and Computer Engineering, University of Shanghai for Science and Technology, Shanghai 200093, China.

<sup>c</sup> Wenzhou Institute, University of Chinese Academy of Sciences, Wenzhou 325001, China.

# These authors contribute equally.

\* Corresponding emails: [fzhang@usst.edu.cn](mailto:fzhang@usst.edu.cn) (F.Z.); [lpwang-wiucas@ucas.ac.cn](mailto:lpwang-wiucas@ucas.ac.cn) (L.W.); [guojun-nbm@wiucas.ac.cn](mailto:guojun-nbm@wiucas.ac.cn) (J. G.)

## **Supplementary methods**

### **1. Circular dichroism (CD) spectroscopy**

A peptide solution with a concentration of 0.2 mM was used to record CD spectra. Far-UV CD spectra between 200 and 260 nm were recorded on a CD spectrometer (Chirascan Plus, Applied Photophysics Ltd., UK) using a cuvette with a pathlength of 2 mm. For each sample, the spectra were averaged from 3 measurements and converted to molar ellipticity. We performed an analysis of the secondary structure content using online tools available at <http://dichroweb.cryst.bbk.ac.uk/html/home.shtml>.

### **2. Fluorescence spectroscopy**

A fluorescence spectrometer (Fluorolog, Horiba scientific Inc., USA) was used to measure the fluorescence spectra between 360 nm and 600 nm with setting 330 nm as the excitation wavelength. Both the excitation and emission slits were set 5 nm.

## Supplementary Figures

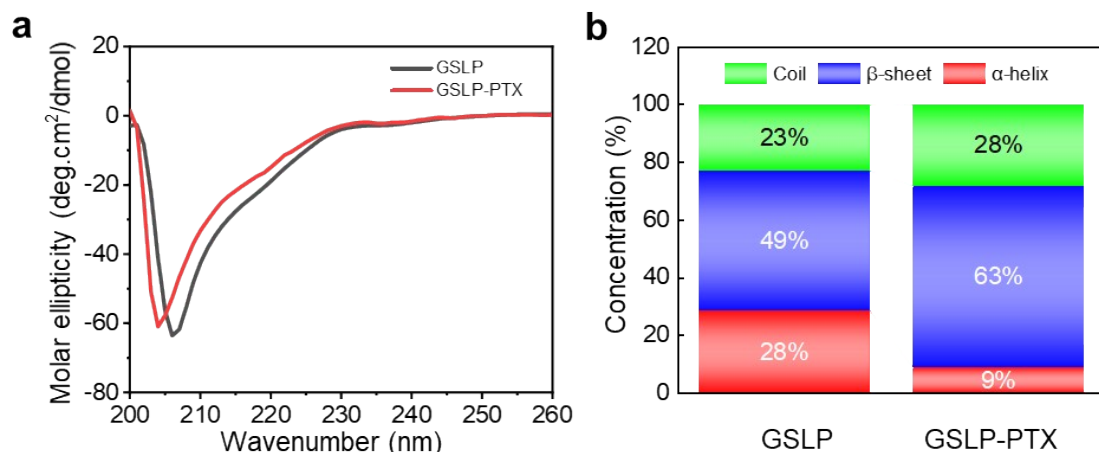

**Figure S1. CD characterization.** (a) CD spectra of GSLP and GSLP-PTX. (b) Secondary structure content of GSLP and GSLP-PTX.

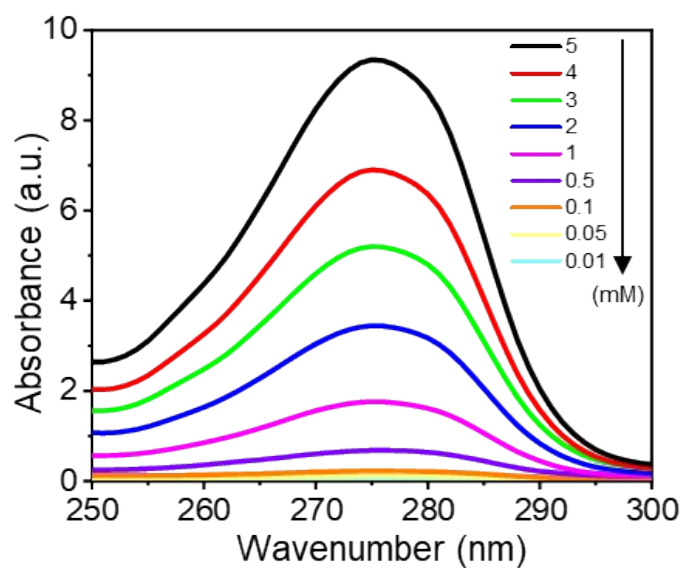

**Figure S2.** UV absorption spectra of peptide solutions of different concentrations as labeled.

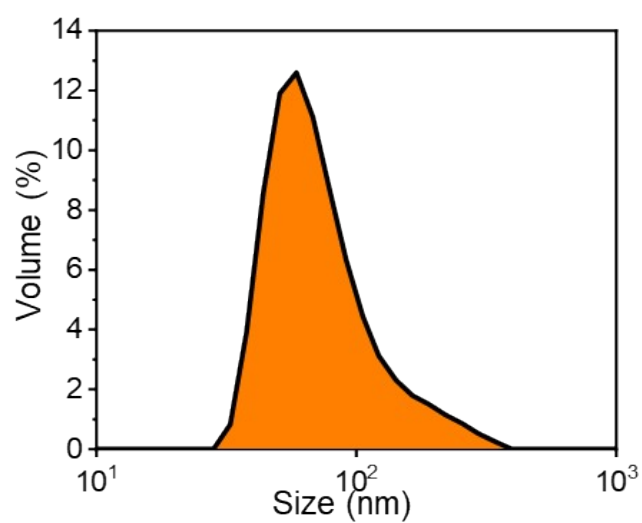

**Figure S3.** Hydrodynamic size of GSLP nanocages after heating at 42 °C for 120 min.

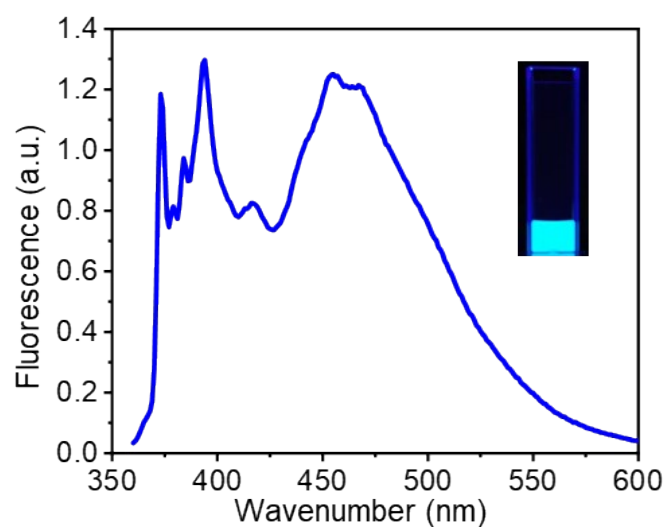

**Figure S4.** Fluorescence spectra of the  $\beta$ -nanocages after encapsulation of pyrene molecules. The inset photo shows the fluorescence of GSLP-pyrene in a cuvette under UV lamp excitation.
